# Supplementary material for: Generalized Seasonal Autoregressive Integrated Moving Average Models for Count Data with Application to Malaria Time Series with Low Case Numbers
Source: PubMed Central journal article supplement (PMC3681978; doi:10.1371/journal.pone.0065761), 2013-06-13

Partial autocorrelation function of Box-Cox transformed monthly malaria case counts in Gampaha

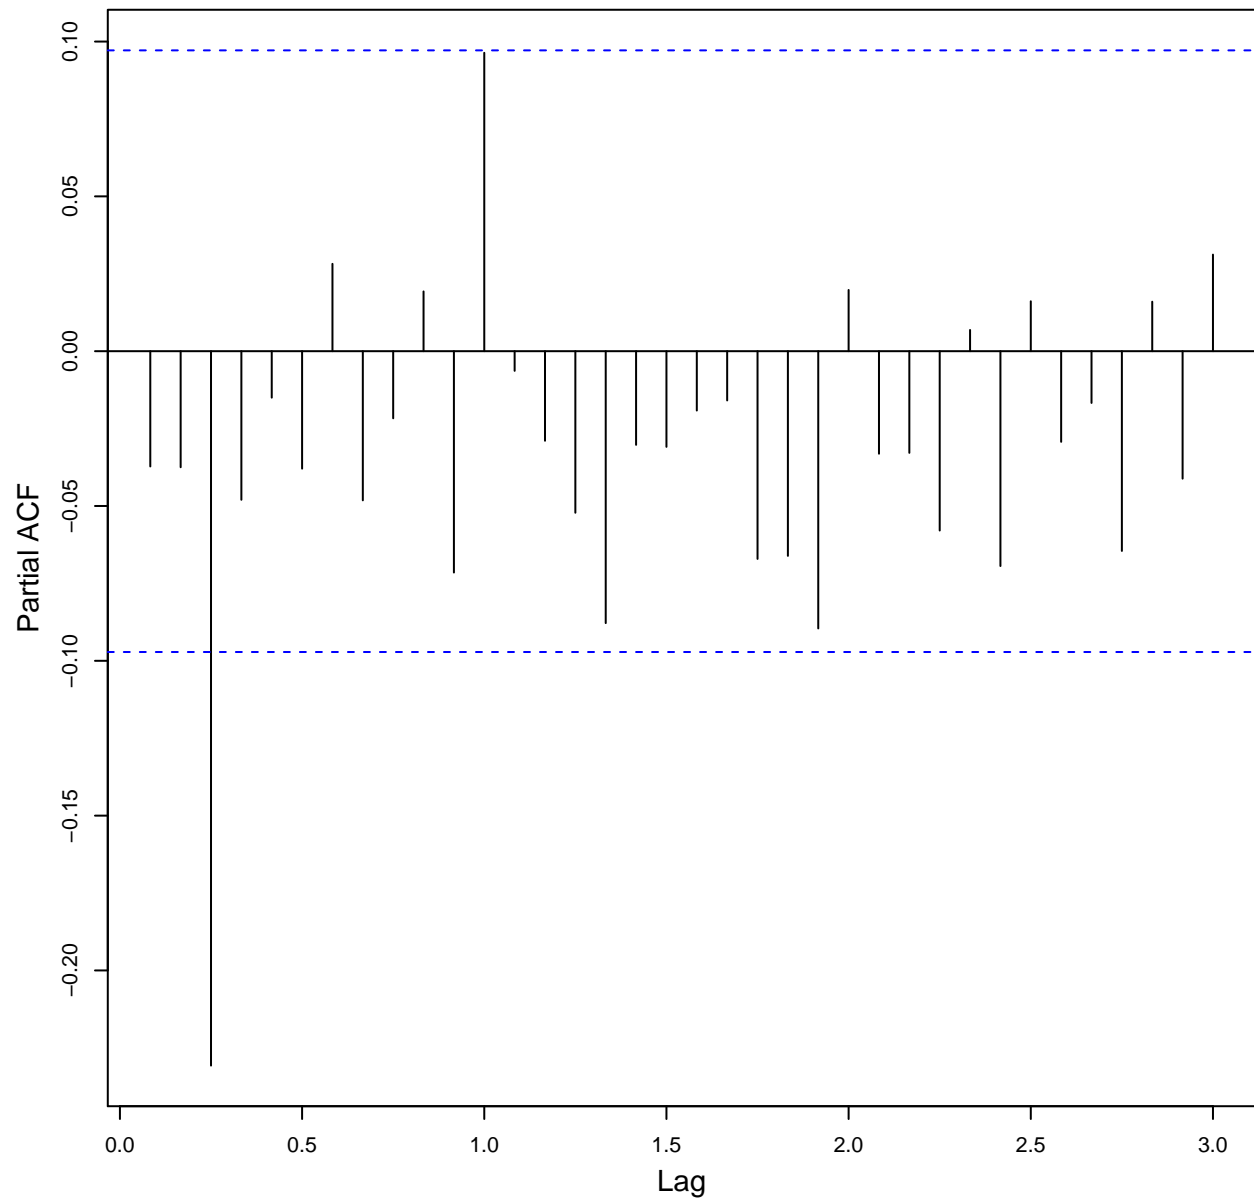

Supplement: pone.0065761.s003.pdf [file pone.0065761.s003.pdf]
