# Supplementary material for: Generalized Seasonal Autoregressive Integrated Moving Average Models for Count Data with Application to Malaria Time Series with Low Case Numbers
Source: PubMed Central journal article supplement (PMC3681978; doi:10.1371/journal.pone.0065761), 2013-06-13

Normalized randomized quantile residuals of negative binomial GSARIMA (3', 1, 0) × (1, 0, 0)<sub>12</sub> model

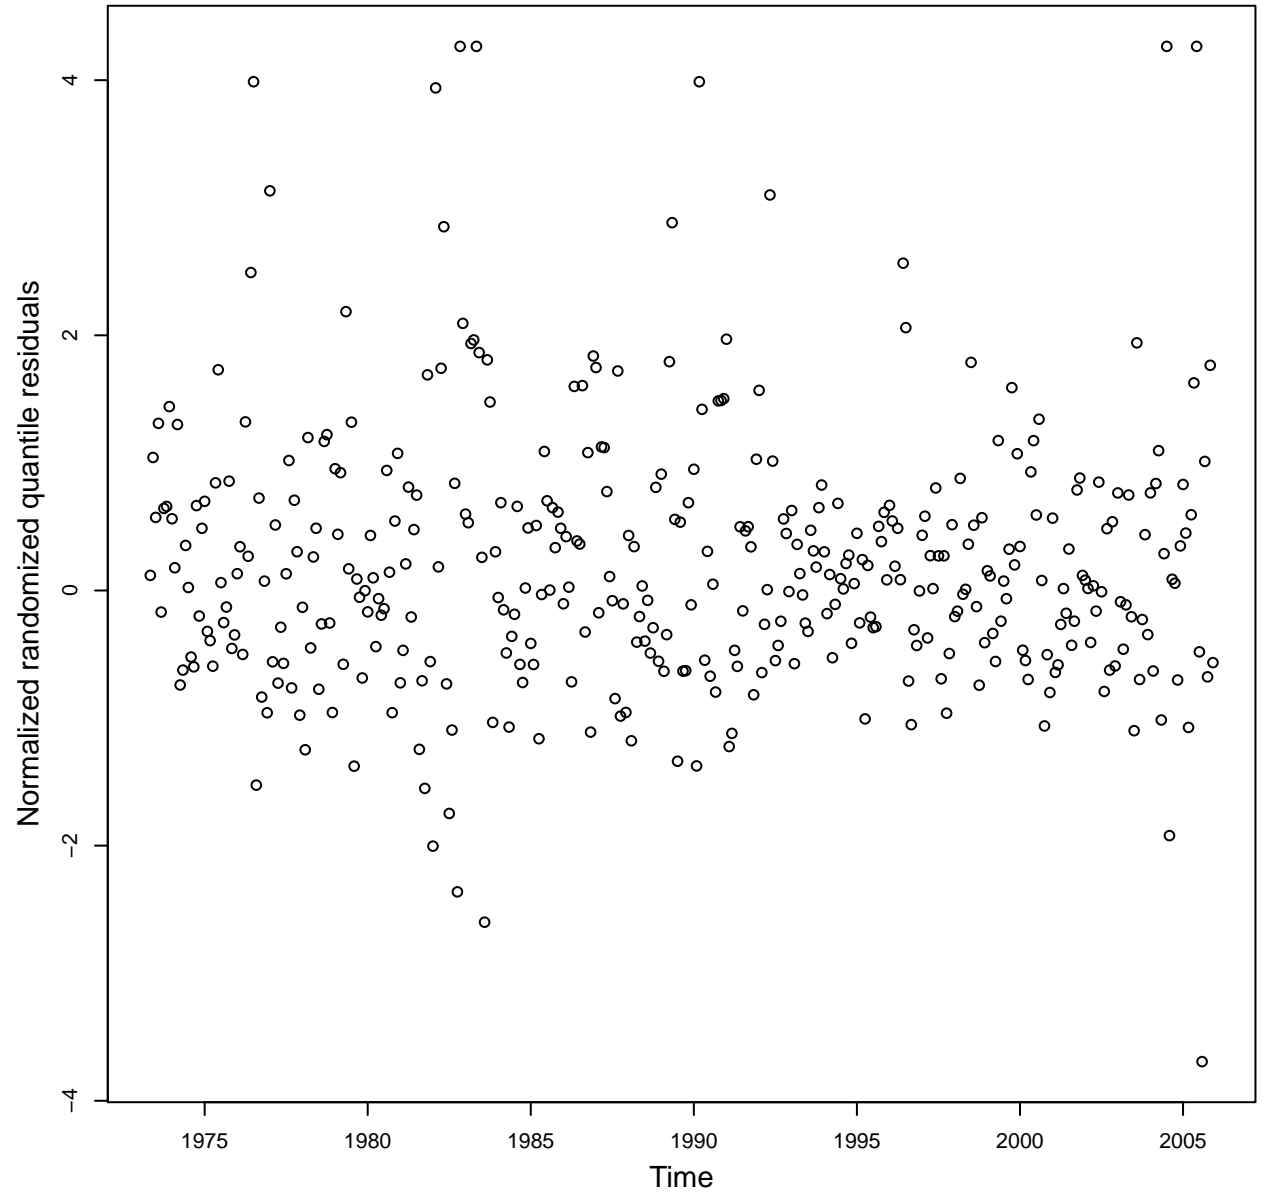

Supplement: pone.0065761.s004.pdf [file pone.0065761.s004.pdf]
